# Supplementary material for: Data-driven deep generative design of stable spintronic materials
Source: Royal Society of Chemistry journal article supplement (doi:10.1039/d3ce00765k), 2023-01-01
Supplement: d3ce00765k1.pdf [file d3ce00765k1.pdf]

## Supporting Information

# Data-Driven Deep Generative Design of Stable Spintronic Materials

Edirisuriya M. Dilanga Siriwardane <sup>†</sup>, Yong Zhao<sup>‡</sup>, and  
Jianjun Hu<sup>‡\*</sup>

<sup>†</sup> Department of Physics,  
University of Colombo,  
Colombo 0300, Sri Lanka

<sup>‡</sup>Department of Computer Science and Engineering,  
University of South Carolina,  
Columbia, SC 29201, USA

Corresponding Author  
\* [jianjunh@csc.sc.edu](mailto:jianjunh@csc.sc.edu)

---

## Supplementary Note 1: The Elemental and Electronic Properties for Feature Engineering

The following atomic and electronic properties were considered to develop the machine learning models. Here, BCC indicates body-centered cubic, and FCC means face-centered cubic.

|                                |                      |                              |
|--------------------------------|----------------------|------------------------------|
| Atomic volume                  | Is Mendeleev         | Column number                |
| Atomic number                  | Is meta              | Covalent radius              |
| Atomic weight                  | Is nonmetal          | Density                      |
| BCC energy diff                | Is metalloid         | First ionization energy      |
| BCC effective lattice constant | Is alkali            | Ground state band gap        |
| BCC fermi                      | Is d-block           | Ground state eflatent        |
| BCC magnetic moment            | Is f-block           | Ground state estBCClatent    |
| BCC volume padiff              | Number of valence    | Ground state estFCClatent    |
| BCC volume pa.                 | Number of unfilled   | Ground state magnetic moment |
| Boiling temperature            | Number of s valence  | Ground state volume pa       |
| ICSD volume                    | Space group number   | Row number                   |
| Number of d unfilled           | Number of d valence  | Number of f unfilled         |
| Number of f valence            | Number of p unfilled | Number of p valence          |
| Number of s unfilled           | Oxidation states     | Polarizability               |

## Supplementary Note 2: Predicted Spintronic Materials

The following table contains the chemical formulas of the spintronic materials predicted by the deep neural network (DNN) model. The material structures can be downloaded from the Carolina Materials database at <http://www.carolinamatdb.org/>.

Supplementary Table 1: The spintronic materials predicted by the DNN model

|                      |                                  |                                   |
|----------------------|----------------------------------|-----------------------------------|
| AlCo <sub>6</sub> N  | Fe <sub>6</sub> RhCl             | Fe <sub>6</sub> N <sub>6</sub> Cl |
| BaCuF <sub>6</sub>   | Fe <sub>6</sub> RhN              | Hf <sub>6</sub> MnN <sub>6</sub>  |
| BaNiF <sub>6</sub>   | Fe <sub>6</sub> RhS              | K <sub>6</sub> FeO <sub>6</sub>   |
| BaRhF <sub>6</sub>   | FeCo <sub>6</sub> C              | K <sub>6</sub> OsS <sub>6</sub>   |
| BaRuF <sub>6</sub>   | FeRh <sub>6</sub> O              | K <sub>6</sub> TcO <sub>6</sub>   |
| CaCo <sub>6</sub> N  | GaCo <sub>6</sub> N              | K <sub>6</sub> WO <sub>6</sub>    |
| Co <sub>6</sub> IrN  | HfCo <sub>6</sub> C              | Mg <sub>6</sub> FeO <sub>6</sub>  |
| Co <sub>6</sub> RhN  | InCo <sub>6</sub> N              | Na <sub>6</sub> MoO <sub>6</sub>  |
| Co <sub>6</sub> RuN  | Mn <sub>6</sub> AuS              | Na <sub>6</sub> RuO <sub>6</sub>  |
| Co <sub>6</sub> SbN  | MnNi <sub>6</sub> N              | Na <sub>6</sub> TcO <sub>6</sub>  |
| Co <sub>6</sub> TeO  | SrCuF <sub>6</sub>               | Na <sub>6</sub> WO <sub>6</sub>   |
| CoNi <sub>6</sub> N  | TlCo <sub>6</sub> P              | Rb <sub>6</sub> IrO <sub>6</sub>  |
| Fe <sub>6</sub> CoN  | ZrCo <sub>6</sub> Cl             | Rb <sub>6</sub> ReS <sub>6</sub>  |
| Fe <sub>6</sub> PtCl | Cs <sub>6</sub> ReS <sub>6</sub> | Rb <sub>6</sub> TcO <sub>6</sub>  |
| Fe <sub>6</sub> PtN  | Cs <sub>6</sub> RuO <sub>6</sub> | V <sub>6</sub> S <sub>6</sub> Cl  |

### Supplementary Note 3: GGA and GGA+U Calculations

We performed GGA+U calculations to determine whether the onsite Coulomb potential affects the results. Table 2 contains the band gap values in eV for spin-up and spin-down electrons. It is clear that  $\text{BaCuF}_6$  and  $\text{Na}_6\text{TcO}_6$  remain half-metals.  $\text{K}_6\text{TcO}_6$  and  $\text{Rb}_6\text{IrO}_6$  have negligible band gap openings when we enable the  $U$  potential. Figure 1 shows the energy of the non-magnetic phase ( $E_{NM}$ ) relative to the ferromagnetic phase as the  $U$  value is altered. The positive  $E_{NM}$  values indicate that all materials remain magnetic based on GGA+U calculations.

Supplementary Table 2: Band gap from GGA ( $U = 0$  eV), and GGA+U calculations, when  $U = 2$  eV and  $U = 4$  eV.

| Material                  | $U = 0$ eV |      | $U = 2$ eV |      | $U = 4$ eV |       |
|---------------------------|------------|------|------------|------|------------|-------|
|                           | Up         | Down | Up         | Down | Up         | Down  |
| $\text{BaCuF}_6$          | 0.00       | 0.96 | 0.00       | 1.05 | 0.00       | 1.15  |
| $\text{Na}_6\text{TcO}_6$ | 0.00       | 1.83 | 0.00       | 2.02 | 0.00       | 2.04  |
| $\text{K}_6\text{TcO}_6$  | 0.00       | 0.00 | 0.00       | 0.03 | 0.00       | 0.02  |
| $\text{Rb}_6\text{IrO}_6$ | 0.00       | 0.00 | 0.01       | 0.01 | 0.07       | 0.007 |

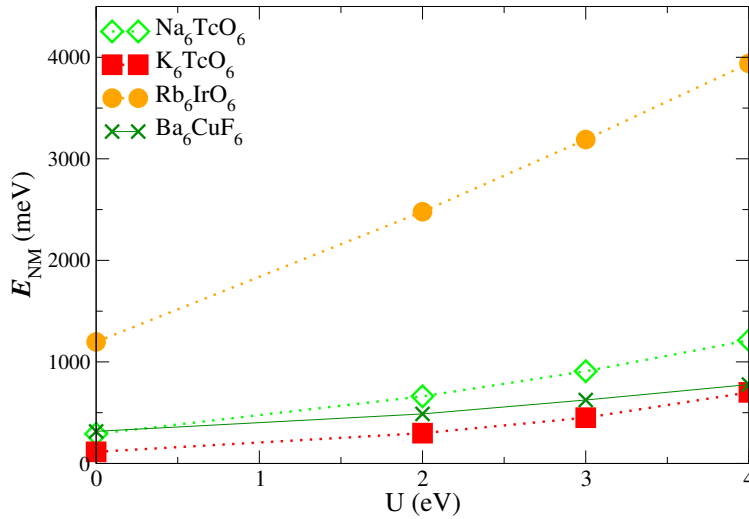

Supplementary Figure 1: The energy of non magnetic phase relative to the ferromagnetic phase based on GGA ( $U = 0$ ) and GGA+U calculations.

## Supplementary Note 4: Stable Structures

The following structures are the computationally discovered stable spintronic materials in the CIF format.

### BaCuF<sub>6</sub>

```

=====
# CRYSTAL DATA
#-----
data_VESTA_phase_1

_chemical_name_common      'Ba4 Cu4 F24'
_cell_length_a             8.125344
_cell_length_b             8.125344
_cell_length_c             8.125344
_cell_angle_alpha         90.000000
_cell_angle_beta          90.000000
_cell_angle_gamma         90.000000
_cell_volume               536.445139
_space_group_name_H-M_alt  'P 1'
_space_group_IT_number     1

loop_
_space_group_symop_operation_xyz
  'x, y, z'

loop_
  _atom_site_label
  _atom_site_occupancy
  _atom_site_fract_x
  _atom_site_fract_y
  _atom_site_fract_z
  _atom_site_adp_type
  _atom_site_B_iso_or_equiv
  _atom_site_type_symbol
  Ba1      1.0    0.750000    0.250000    0.750000    Biso  1.000000 Ba
  Ba2      1.0    0.750000    0.750000    0.250000    Biso  1.000000 Ba
  Ba3      1.0    0.250000    0.250000    0.250000    Biso  1.000000 Ba
  Ba4      1.0    0.250000    0.750000    0.750000    Biso  1.000000 Ba
  Cu1      1.0    -0.000000   -0.000000   -0.000000    Biso  1.000000 Cu
  Cu2      1.0    -0.000000    0.500000    0.500000    Biso  1.000000 Cu
  Cu3      1.0    0.500000   -0.000000    0.500000    Biso  1.000000 Cu
  Cu4      1.0    0.500000    0.500000   -0.000000    Biso  1.000000 Cu
  F1       1.0    0.500000   -0.000000    0.728783    Biso  1.000000 F

```

|     |     |           |           |           |      |          |   |
|-----|-----|-----------|-----------|-----------|------|----------|---|
| F2  | 1.0 | 0.500000  | -0.000000 | 0.271217  | Biso | 1.000000 | F |
| F3  | 1.0 | 0.228783  | -0.000000 | -0.000000 | Biso | 1.000000 | F |
| F4  | 1.0 | 0.771217  | -0.000000 | -0.000000 | Biso | 1.000000 | F |
| F5  | 1.0 | -0.000000 | 0.228783  | -0.000000 | Biso | 1.000000 | F |
| F6  | 1.0 | 0.500000  | 0.271217  | -0.000000 | Biso | 1.000000 | F |
| F7  | 1.0 | 0.500000  | 0.500000  | 0.228783  | Biso | 1.000000 | F |
| F8  | 1.0 | 0.500000  | 0.500000  | 0.771217  | Biso | 1.000000 | F |
| F9  | 1.0 | 0.228783  | 0.500000  | 0.500000  | Biso | 1.000000 | F |
| F10 | 1.0 | 0.771217  | 0.500000  | 0.500000  | Biso | 1.000000 | F |
| F11 | 1.0 | -0.000000 | 0.728783  | 0.500000  | Biso | 1.000000 | F |
| F12 | 1.0 | 0.500000  | 0.771217  | 0.500000  | Biso | 1.000000 | F |
| F13 | 1.0 | -0.000000 | -0.000000 | 0.228783  | Biso | 1.000000 | F |
| F14 | 1.0 | -0.000000 | -0.000000 | 0.771217  | Biso | 1.000000 | F |
| F15 | 1.0 | 0.728783  | -0.000000 | 0.500000  | Biso | 1.000000 | F |
| F16 | 1.0 | 0.271217  | -0.000000 | 0.500000  | Biso | 1.000000 | F |
| F17 | 1.0 | 0.500000  | 0.228783  | 0.500000  | Biso | 1.000000 | F |
| F18 | 1.0 | -0.000000 | 0.271217  | 0.500000  | Biso | 1.000000 | F |
| F19 | 1.0 | -0.000000 | 0.500000  | 0.728783  | Biso | 1.000000 | F |
| F20 | 1.0 | -0.000000 | 0.500000  | 0.271217  | Biso | 1.000000 | F |
| F21 | 1.0 | 0.728783  | 0.500000  | -0.000000 | Biso | 1.000000 | F |
| F22 | 1.0 | 0.271217  | 0.500000  | -0.000000 | Biso | 1.000000 | F |
| F23 | 1.0 | 0.500000  | 0.728783  | -0.000000 | Biso | 1.000000 | F |
| F24 | 1.0 | -0.000000 | 0.771217  | -0.000000 | Biso | 1.000000 | F |

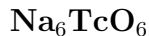

```

=====
# CRYSTAL DATA
#-----
data_VESTA_phase_1

_chemical_name_common           'Na24 Tc4 O24          '
_cell_length_a                  9.275142
_cell_length_b                  9.275142
_cell_length_c                  9.275142
_cell_angle_alpha               90.000000
_cell_angle_beta               90.000000
_cell_angle_gamma              90.000000
_cell_volume                    797.924246
_space_group_name_H-M_alt       'P 1'
_space_group_IT_number          1

loop_
_space_group_symop_operation_xyz
  'x, y, z'

loop_
  _atom_site_label
  _atom_site_occupancy
  _atom_site_fract_x
  _atom_site_fract_y
  _atom_site_fract_z
  _atom_site_adp_type
  _atom_site_B_iso_or_equiv
  _atom_site_type_symbol
Na1      1.0    -0.000000    0.750000    0.750000    Biso  1.000000  Na
Na2      1.0     0.250000   -0.000000    0.750000    Biso  1.000000  Na
Na3      1.0    -0.000000    0.250000    0.750000    Biso  1.000000  Na
Na4      1.0     0.750000   -0.000000    0.750000    Biso  1.000000  Na
Na5      1.0     0.250000    0.750000   -0.000000    Biso  1.000000  Na
Na6      1.0     0.250000    0.250000   -0.000000    Biso  1.000000  Na
Na7      1.0    -0.000000    0.250000    0.250000    Biso  1.000000  Na
Na8      1.0     0.250000    0.500000    0.250000    Biso  1.000000  Na
Na9      1.0    -0.000000    0.750000    0.250000    Biso  1.000000  Na
Na10     1.0     0.750000    0.500000    0.250000    Biso  1.000000  Na
Na11     1.0     0.250000    0.250000    0.500000    Biso  1.000000  Na
Na12     1.0     0.250000    0.750000    0.500000    Biso  1.000000  Na

```

|      |     |           |           |           |      |          |    |
|------|-----|-----------|-----------|-----------|------|----------|----|
| Na13 | 1.0 | 0.500000  | 0.750000  | 0.250000  | Biso | 1.000000 | Na |
| Na14 | 1.0 | 0.750000  | -0.000000 | 0.250000  | Biso | 1.000000 | Na |
| Na15 | 1.0 | 0.500000  | 0.250000  | 0.250000  | Biso | 1.000000 | Na |
| Na16 | 1.0 | 0.250000  | -0.000000 | 0.250000  | Biso | 1.000000 | Na |
| Na17 | 1.0 | 0.750000  | 0.750000  | 0.500000  | Biso | 1.000000 | Na |
| Na18 | 1.0 | 0.750000  | 0.250000  | 0.500000  | Biso | 1.000000 | Na |
| Na19 | 1.0 | 0.500000  | 0.250000  | 0.750000  | Biso | 1.000000 | Na |
| Na20 | 1.0 | 0.750000  | 0.500000  | 0.750000  | Biso | 1.000000 | Na |
| Na21 | 1.0 | 0.500000  | 0.750000  | 0.750000  | Biso | 1.000000 | Na |
| Na22 | 1.0 | 0.250000  | 0.500000  | 0.750000  | Biso | 1.000000 | Na |
| Na23 | 1.0 | 0.750000  | 0.250000  | -0.000000 | Biso | 1.000000 | Na |
| Na24 | 1.0 | 0.750000  | 0.750000  | -0.000000 | Biso | 1.000000 | Na |
| Tc1  | 1.0 | -0.000000 | -0.000000 | -0.000000 | Biso | 1.000000 | Tc |
| Tc2  | 1.0 | -0.000000 | 0.500000  | 0.500000  | Biso | 1.000000 | Tc |
| Tc3  | 1.0 | 0.500000  | -0.000000 | 0.500000  | Biso | 1.000000 | Tc |
| Tc4  | 1.0 | 0.500000  | 0.500000  | -0.000000 | Biso | 1.000000 | Tc |
| 01   | 1.0 | 0.500000  | -0.000000 | 0.710815  | Biso | 1.000000 | 0  |
| 02   | 1.0 | -0.000000 | -0.000000 | 0.789185  | Biso | 1.000000 | 0  |
| 03   | 1.0 | 0.210815  | -0.000000 | -0.000000 | Biso | 1.000000 | 0  |
| 04   | 1.0 | 0.789185  | -0.000000 | -0.000000 | Biso | 1.000000 | 0  |
| 05   | 1.0 | 0.500000  | 0.710815  | -0.000000 | Biso | 1.000000 | 0  |
| 06   | 1.0 | 0.500000  | 0.289185  | -0.000000 | Biso | 1.000000 | 0  |
| 07   | 1.0 | 0.500000  | 0.500000  | 0.210815  | Biso | 1.000000 | 0  |
| 08   | 1.0 | -0.000000 | 0.500000  | 0.289185  | Biso | 1.000000 | 0  |
| 09   | 1.0 | 0.210815  | 0.500000  | 0.500000  | Biso | 1.000000 | 0  |
| 010  | 1.0 | 0.789185  | 0.500000  | 0.500000  | Biso | 1.000000 | 0  |
| 011  | 1.0 | 0.500000  | 0.210815  | 0.500000  | Biso | 1.000000 | 0  |
| 012  | 1.0 | 0.500000  | 0.789185  | 0.500000  | Biso | 1.000000 | 0  |
| 013  | 1.0 | -0.000000 | -0.000000 | 0.210815  | Biso | 1.000000 | 0  |
| 014  | 1.0 | 0.500000  | -0.000000 | 0.289185  | Biso | 1.000000 | 0  |
| 015  | 1.0 | 0.710815  | -0.000000 | 0.500000  | Biso | 1.000000 | 0  |
| 016  | 1.0 | 0.289185  | -0.000000 | 0.500000  | Biso | 1.000000 | 0  |
| 017  | 1.0 | -0.000000 | 0.710815  | 0.500000  | Biso | 1.000000 | 0  |
| 018  | 1.0 | -0.000000 | 0.289185  | 0.500000  | Biso | 1.000000 | 0  |
| 019  | 1.0 | -0.000000 | 0.500000  | 0.710815  | Biso | 1.000000 | 0  |
| 020  | 1.0 | 0.500000  | 0.500000  | 0.789185  | Biso | 1.000000 | 0  |
| 021  | 1.0 | 0.710815  | 0.500000  | -0.000000 | Biso | 1.000000 | 0  |
| 022  | 1.0 | 0.289185  | 0.500000  | -0.000000 | Biso | 1.000000 | 0  |
| 023  | 1.0 | -0.000000 | 0.210815  | -0.000000 | Biso | 1.000000 | 0  |
| 024  | 1.0 | -0.000000 | 0.789185  | -0.000000 | Biso | 1.000000 | 0  |

**K<sub>6</sub>TcO<sub>6</sub>**

```

#=====
# CRYSTAL DATA
#-----
data_VESTA_phase_1

_chemical_name_common          'K24 Tc O24          '
_cell_length_a                 10.335238
_cell_length_b                 10.335238
_cell_length_c                 10.335238
_cell_angle_alpha              90.000000
_cell_angle_beta               90.000000
_cell_angle_gamma              90.000000
_cell_volume                   1103.980452
_space_group_name_H-M_alt      'P 1'
_space_group_IT_number         1

loop_
_space_group_symop_operation_xyz
  'x, y, z'

loop_
_atom_site_label
_atom_site_occupancy
_atom_site_fract_x
_atom_site_fract_y
_atom_site_fract_z
_atom_site_adp_type
_atom_site_B_iso_or_equiv
_atom_site_type_symbol
K1      1.0    -0.000000    0.750000    0.750000    Biso  1.000000 K
K2      1.0     0.250000    0.000000    0.750000    Biso  1.000000 K
K3      1.0    -0.000000    0.250000    0.750000    Biso  1.000000 K
K4      1.0     0.750000   -0.000000    0.750000    Biso  1.000000 K
K5      1.0     0.250000    0.750000    0.000000    Biso  1.000000 K
K6      1.0     0.250000    0.250000    0.000000    Biso  1.000000 K
K7      1.0    -0.000000    0.250000    0.250000    Biso  1.000000 K
K8      1.0     0.250000    0.500000    0.250000    Biso  1.000000 K
K9      1.0    -0.000000    0.750000    0.250000    Biso  1.000000 K
K10     1.0     0.750000    0.500000    0.250000    Biso  1.000000 K
K11     1.0     0.250000    0.250000    0.500000    Biso  1.000000 K
K12     1.0     0.250000    0.750000    0.500000    Biso  1.000000 K
K13     1.0     0.500000    0.750000    0.250000    Biso  1.000000 K

```



|     |     |           |           |           |      |          |    |
|-----|-----|-----------|-----------|-----------|------|----------|----|
| K14 | 1.0 | 0.750000  | 0.000000  | 0.250000  | Biso | 1.000000 | K  |
| K15 | 1.0 | 0.500000  | 0.250000  | 0.250000  | Biso | 1.000000 | K  |
| K16 | 1.0 | 0.250000  | -0.000000 | 0.250000  | Biso | 1.000000 | K  |
| K17 | 1.0 | 0.750000  | 0.750000  | 0.500000  | Biso | 1.000000 | K  |
| K18 | 1.0 | 0.750000  | 0.250000  | 0.500000  | Biso | 1.000000 | K  |
| K19 | 1.0 | 0.500000  | 0.250000  | 0.750000  | Biso | 1.000000 | K  |
| K20 | 1.0 | 0.750000  | 0.500000  | 0.750000  | Biso | 1.000000 | K  |
| K21 | 1.0 | 0.500000  | 0.750000  | 0.750000  | Biso | 1.000000 | K  |
| K22 | 1.0 | 0.250000  | 0.500000  | 0.750000  | Biso | 1.000000 | K  |
| K23 | 1.0 | 0.750000  | 0.250000  | 0.000000  | Biso | 1.000000 | K  |
| K24 | 1.0 | 0.750000  | 0.750000  | 0.000000  | Biso | 1.000000 | K  |
| Tc1 | 1.0 | -0.000000 | -0.000000 | 0.000000  | Biso | 1.000000 | Tc |
| Tc2 | 1.0 | -0.000000 | 0.500000  | 0.500000  | Biso | 1.000000 | Tc |
| Tc3 | 1.0 | 0.500000  | -0.000000 | 0.500000  | Biso | 1.000000 | Tc |
| Tc4 | 1.0 | 0.500000  | 0.500000  | 0.000000  | Biso | 1.000000 | Tc |
| 01  | 1.0 | 0.500000  | 0.000000  | 0.689645  | Biso | 1.000000 | 0  |
| 02  | 1.0 | -0.000000 | -0.000000 | 0.810355  | Biso | 1.000000 | 0  |
| 03  | 1.0 | 0.189645  | -0.000000 | 0.000000  | Biso | 1.000000 | 0  |
| 04  | 1.0 | 0.810355  | 0.000000  | 0.000000  | Biso | 1.000000 | 0  |
| 05  | 1.0 | 0.500000  | 0.689645  | -0.000000 | Biso | 1.000000 | 0  |
| 06  | 1.0 | 0.500000  | 0.310355  | 0.000000  | Biso | 1.000000 | 0  |
| 07  | 1.0 | 0.500000  | 0.500000  | 0.189645  | Biso | 1.000000 | 0  |
| 08  | 1.0 | -0.000000 | 0.500000  | 0.310355  | Biso | 1.000000 | 0  |
| 09  | 1.0 | 0.189645  | 0.500000  | 0.500000  | Biso | 1.000000 | 0  |
| 010 | 1.0 | 0.810355  | 0.500000  | 0.500000  | Biso | 1.000000 | 0  |
| 011 | 1.0 | 0.500000  | 0.189645  | 0.500000  | Biso | 1.000000 | 0  |
| 012 | 1.0 | 0.500000  | 0.810355  | 0.500000  | Biso | 1.000000 | 0  |
| 013 | 1.0 | -0.000000 | 0.000000  | 0.189645  | Biso | 1.000000 | 0  |
| 014 | 1.0 | 0.500000  | -0.000000 | 0.310355  | Biso | 1.000000 | 0  |
| 015 | 1.0 | 0.689645  | -0.000000 | 0.500000  | Biso | 1.000000 | 0  |
| 016 | 1.0 | 0.310355  | 0.000000  | 0.500000  | Biso | 1.000000 | 0  |
| 017 | 1.0 | -0.000000 | 0.689645  | 0.500000  | Biso | 1.000000 | 0  |
| 018 | 1.0 | -0.000000 | 0.310355  | 0.500000  | Biso | 1.000000 | 0  |
| 019 | 1.0 | -0.000000 | 0.500000  | 0.689645  | Biso | 1.000000 | 0  |
| 020 | 1.0 | 0.500000  | 0.500000  | 0.810355  | Biso | 1.000000 | 0  |
| 021 | 1.0 | 0.689645  | 0.500000  | -0.000000 | Biso | 1.000000 | 0  |
| 022 | 1.0 | 0.310355  | 0.500000  | -0.000000 | Biso | 1.000000 | 0  |
| 023 | 1.0 | -0.000000 | 0.189645  | -0.000000 | Biso | 1.000000 | 0  |
| 024 | 1.0 | -0.000000 | 0.810355  | 0.000000  | Biso | 1.000000 | 0  |

**Rb<sub>6</sub>IrO<sub>6</sub>**

```

#=====
# CRYSTAL DATA
#-----
data_VESTA_phase_1

_chemical_name_common          'Rb24 Ir4 O24'
_cell_length_a                 10.766218
_cell_length_b                 10.766218
_cell_length_c                 10.766218
_cell_angle_alpha             90.000000
_cell_angle_beta              90.000000
_cell_angle_gamma             90.000000
_cell_volume                   1247.928004
_space_group_name_H-M_alt     'P 1'
_space_group_IT_number        1

loop_
_space_group_symop_operation_xyz
  'x, y, z'

loop_
  _atom_site_label
  _atom_site_occupancy
  _atom_site_fract_x
  _atom_site_fract_y
  _atom_site_fract_z
  _atom_site_adp_type
  _atom_site_B_iso_or_equiv
  _atom_site_type_symbol
Rb1      1.0    0.000000    0.750000    0.750000    Biso  1.000000 Rb
Rb2      1.0    0.250000   -0.000000    0.750000    Biso  1.000000 Rb
Rb3      1.0    0.000000    0.250000    0.750000    Biso  1.000000 Rb
Rb4      1.0    0.750000   -0.000000    0.750000    Biso  1.000000 Rb
Rb5      1.0    0.250000    0.750000   -0.000000    Biso  1.000000 Rb
Rb6      1.0    0.250000    0.250000   -0.000000    Biso  1.000000 Rb
Rb7      1.0    0.000000    0.250000    0.250000    Biso  1.000000 Rb
Rb8      1.0    0.250000    0.500000    0.250000    Biso  1.000000 Rb
Rb9      1.0    0.000000    0.750000    0.250000    Biso  1.000000 Rb
Rb10     1.0    0.750000    0.500000    0.250000    Biso  1.000000 Rb
Rb11     1.0    0.250000    0.250000    0.500000    Biso  1.000000 Rb
Rb12     1.0    0.250000    0.750000    0.500000    Biso  1.000000 Rb
Rb13     1.0    0.500000    0.750000    0.250000    Biso  1.000000 Rb

```

|      |     |          |           |           |      |          |    |
|------|-----|----------|-----------|-----------|------|----------|----|
| Rb14 | 1.0 | 0.750000 | -0.000000 | 0.250000  | Biso | 1.000000 | Rb |
| Rb15 | 1.0 | 0.500000 | 0.250000  | 0.250000  | Biso | 1.000000 | Rb |
| Rb16 | 1.0 | 0.250000 | -0.000000 | 0.250000  | Biso | 1.000000 | Rb |
| Rb17 | 1.0 | 0.750000 | 0.750000  | 0.500000  | Biso | 1.000000 | Rb |
| Rb18 | 1.0 | 0.750000 | 0.250000  | 0.500000  | Biso | 1.000000 | Rb |
| Rb19 | 1.0 | 0.500000 | 0.250000  | 0.750000  | Biso | 1.000000 | Rb |
| Rb20 | 1.0 | 0.750000 | 0.500000  | 0.750000  | Biso | 1.000000 | Rb |
| Rb21 | 1.0 | 0.500000 | 0.750000  | 0.750000  | Biso | 1.000000 | Rb |
| Rb22 | 1.0 | 0.250000 | 0.500000  | 0.750000  | Biso | 1.000000 | Rb |
| Rb23 | 1.0 | 0.750000 | 0.250000  | -0.000000 | Biso | 1.000000 | Rb |
| Rb24 | 1.0 | 0.750000 | 0.750000  | -0.000000 | Biso | 1.000000 | Rb |
| Ir1  | 1.0 | 0.000000 | -0.000000 | -0.000000 | Biso | 1.000000 | Ir |
| Ir2  | 1.0 | 0.000000 | 0.500000  | 0.500000  | Biso | 1.000000 | Ir |
| Ir3  | 1.0 | 0.500000 | -0.000000 | 0.500000  | Biso | 1.000000 | Ir |
| Ir4  | 1.0 | 0.500000 | 0.500000  | -0.000000 | Biso | 1.000000 | Ir |
| 01   | 1.0 | 0.500000 | -0.000000 | 0.685370  | Biso | 1.000000 | 0  |
| 02   | 1.0 | 0.000000 | -0.000000 | 0.814630  | Biso | 1.000000 | 0  |
| 03   | 1.0 | 0.185370 | -0.000000 | -0.000000 | Biso | 1.000000 | 0  |
| 04   | 1.0 | 0.814630 | -0.000000 | -0.000000 | Biso | 1.000000 | 0  |
| 05   | 1.0 | 0.500000 | 0.685370  | -0.000000 | Biso | 1.000000 | 0  |
| 06   | 1.0 | 0.500000 | 0.314630  | -0.000000 | Biso | 1.000000 | 0  |
| 07   | 1.0 | 0.500000 | 0.500000  | 0.185370  | Biso | 1.000000 | 0  |
| 08   | 1.0 | 0.000000 | 0.500000  | 0.314630  | Biso | 1.000000 | 0  |
| 09   | 1.0 | 0.185370 | 0.500000  | 0.500000  | Biso | 1.000000 | 0  |
| 010  | 1.0 | 0.814630 | 0.500000  | 0.500000  | Biso | 1.000000 | 0  |
| 011  | 1.0 | 0.500000 | 0.185370  | 0.500000  | Biso | 1.000000 | 0  |
| 012  | 1.0 | 0.500000 | 0.814630  | 0.500000  | Biso | 1.000000 | 0  |
| 013  | 1.0 | 0.000000 | -0.000000 | 0.185370  | Biso | 1.000000 | 0  |
| 014  | 1.0 | 0.500000 | -0.000000 | 0.314630  | Biso | 1.000000 | 0  |
| 015  | 1.0 | 0.685370 | -0.000000 | 0.500000  | Biso | 1.000000 | 0  |
| 016  | 1.0 | 0.314630 | -0.000000 | 0.500000  | Biso | 1.000000 | 0  |
| 017  | 1.0 | 0.000000 | 0.685370  | 0.500000  | Biso | 1.000000 | 0  |
| 018  | 1.0 | 0.000000 | 0.314630  | 0.500000  | Biso | 1.000000 | 0  |
| 019  | 1.0 | 0.000000 | 0.500000  | 0.685370  | Biso | 1.000000 | 0  |
| 020  | 1.0 | 0.500000 | 0.500000  | 0.814630  | Biso | 1.000000 | 0  |
| 021  | 1.0 | 0.685370 | 0.500000  | -0.000000 | Biso | 1.000000 | 0  |
| 022  | 1.0 | 0.314630 | 0.500000  | -0.000000 | Biso | 1.000000 | 0  |
| 023  | 1.0 | 0.000000 | 0.185370  | -0.000000 | Biso | 1.000000 | 0  |
| 024  | 1.0 | 0.000000 | 0.814630  | -0.000000 | Biso | 1.000000 | 0  |
